# Supplementary material
Source: Springer Nature journal article supplement (https://www.springermedizin.de/resource/supplementary/12875_2013_1174_MOESM4_ESM.docx/9435946)
Supplement: MOESM4 [file 9435946]

*Table 2 Patients with first or new depressive symptoms receiving an antidepressant prescription or being referred to mental healthcare within one month (in percentages of the total of patients with a first or new depressive episode)*

|  | QIC practices | | |  | Usual care practices | | |
| --- | --- | --- | --- | --- | --- | --- | --- |
|  | 2006 | 2007 | 2008 |  | 2006 | 2007 | 2008 |
| Antidepressant  prescription | 49.4 | 32.2* | 26.1* |  | 50.3 | 47.0 | 52.6 |
|  |  |  |  |  |  |  |  |
| Referral to  mental healthcare | 11.5 | 16.4 | 11.2 |  | 10.1 | 13.0* | 9.0 |
|  |  |  |  |  |  |  |  |
| N | 87 | 152 | 161 |  | 1261 | 996 | 1699 |

* sign. < 0,05 compared with baseline (2006)
